# Supplementary material for: Genomic Landscape Survey Identifies SRSF1 as a Key Oncodriver in Small Cell Lung Cancer
Source: PLoS Genet. 2016 Apr 19;12(4):e1005895. doi: 10.1371/journal.pgen.1005895 (PMC4836692; doi:10.1371/journal.pgen.1005895)
Supplement: S11 Table — (XLSX) [file pgen.1005895.s022.xlsx]

## Sheet: Sheet1
Table S11. Commercial Caucasian patient information
Path ID	Patient ID	Stage	Collapsed stage	Gender	Age at diagnosis
1594	110029266	Stage IA	1	M	69
1603	110029275	Stage IB	1	M	73
1608	110029280	Stage IA	1	M	67
1610	110029282	Stage IA	1	F	63
9144	110027493	Stage IA	1	M	76
9145	110027494	Stage IB	1	M	76
9154	110027503	Stage IB	1	M	63
9156	110027505	Stage IB	1	M	58
9159	110027508	Stage IA	1	M	57
1606	110029278	Stage IIA	2	M	66
1607	110029279	Stage IIA	2	M	68
9153	110027502	Stage IIA	2	M	64
9158	110027507	Stage IIIA	2	M	60
9162	110027511	Stage IIB	2	M	65
9163	110027512	Stage IIB	2	M	67
1596	110029268	Stage IIIA	3	M	63
1600	110029272	Stage IIIA	3	M	67
1602	110029274	Stage IIIA	3	M	69
1612	110029284	Stage IIIA	3	M	40
9146	110027495	Stage IIIA	3	M	56
9150	110027499	Stage IIIA	3	M	43
9152	110027501	Stage IIIA	3	M	69
1593	110029265	Stage IV	4	M	69
1599	110029271	Stage IV	4	M	65
1601	110029273	Stage IIIA	3	M	50
